# Supplementary material for: MOF-assisted construction of a Co9S8@Ni3S2/ZnS microplate array with ultrahigh areal specific capacity for advanced supercapattery
Source: Royal Society of Chemistry journal article supplement (doi:10.1039/d0dt02127j), 2020-01-01
Supplement: d0dt02127j1.pdf [file d0dt02127j1.pdf]

### Supporting Information

## MOF-assisted construction of $\text{Co}_9\text{S}_8@\text{Ni}_3\text{S}_2/\text{ZnS}$ microplate array with ultrahigh areal specific capacity for advanced supercapattery

Hongmei Chen<sup>a</sup>, Jiaojiao Zhou<sup>\*,a,b</sup>, Qin Li<sup>a</sup>, Shihang Zhao<sup>a</sup>, Xianbo Yu<sup>a</sup>, Kai Tao<sup>a</sup>, Yaoping Hu<sup>a</sup> and Lei Han<sup>\*,a</sup>

<sup>a</sup> State Key Laboratory Base of Novel Functional Materials and Preparation Science, School of Materials Science & Chemical Engineering, Ningbo University, Ningbo, Zhejiang 315211, China

<sup>b</sup> School of Materials Science and Engineering, East China University of Science and Technology, Shanghai 200237, China

\*Corresponding email: [hanlei@nbu.edu.cn](mailto:hanlei@nbu.edu.cn) (L Han), [Y10190102@mail.ecust.edu.cn](mailto:Y10190102@mail.ecust.edu.cn) (JJ Zhou)

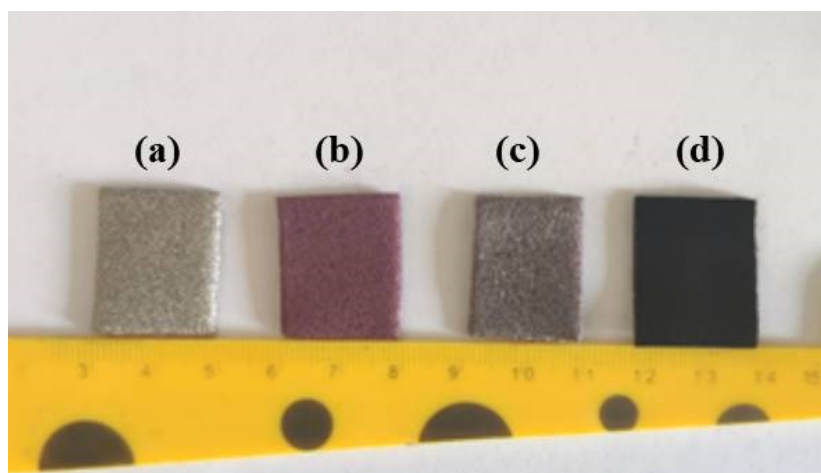

**Figure S1.** Photographs of (a) Ni foam, (b)  $\text{Co}_2(\text{OH})_2\text{CO}_3$ , (c)  $\text{Co}_2(\text{OH})_2\text{CO}_3@\text{NiZn-MOF}$ , (d)  $\text{Co}_9\text{S}_8@\text{Ni}_3\text{S}_2/\text{ZnS}$ .

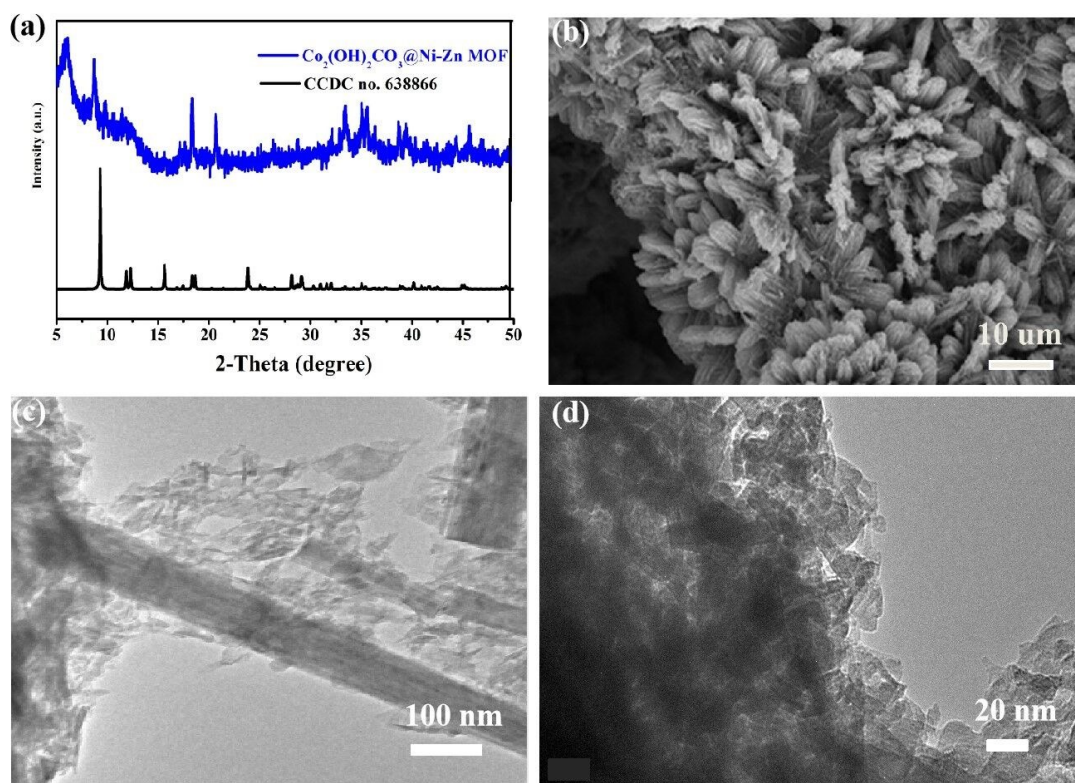

**Figure S2.** (a) XRD pattern, (b) SEM image, (c,d) TEM images of  $\text{Co}_2(\text{OH})_2\text{CO}_3@$ NiZn-MOF.

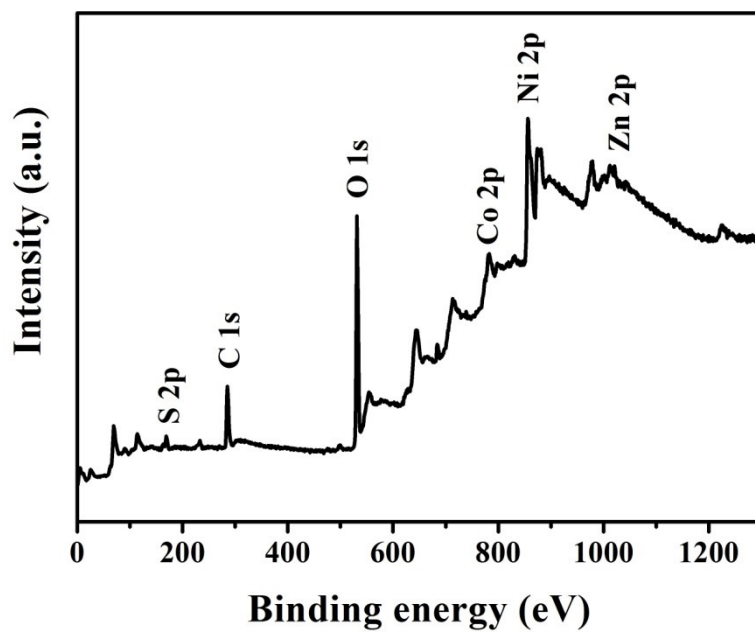

**Figure S3.** XPS survey spectrum of  $\text{Co}_9\text{S}_8@$  $\text{Ni}_3\text{S}_2/\text{ZnS}$  composite.

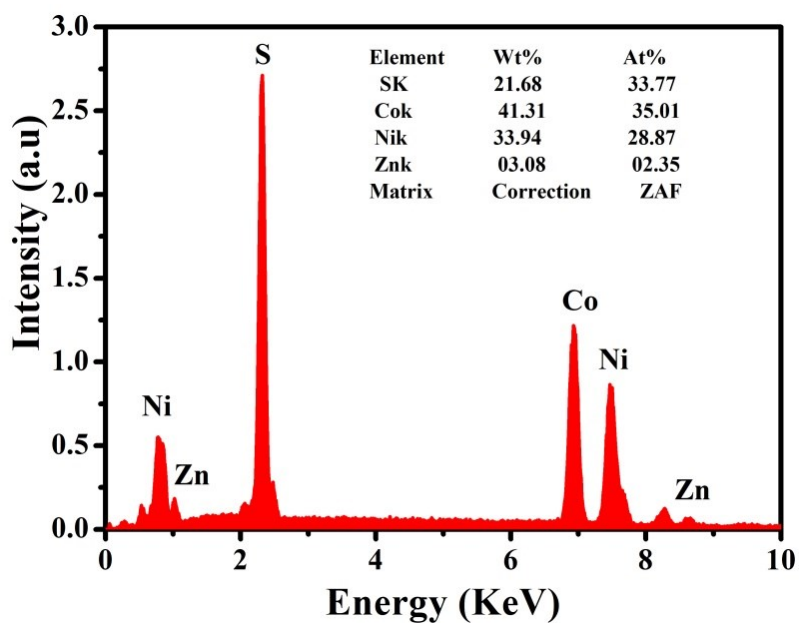

Figure S4. EDS spectrum of  $\text{Co}_9\text{S}_8@\text{Ni}_3\text{S}_2/\text{ZnS}$  array.

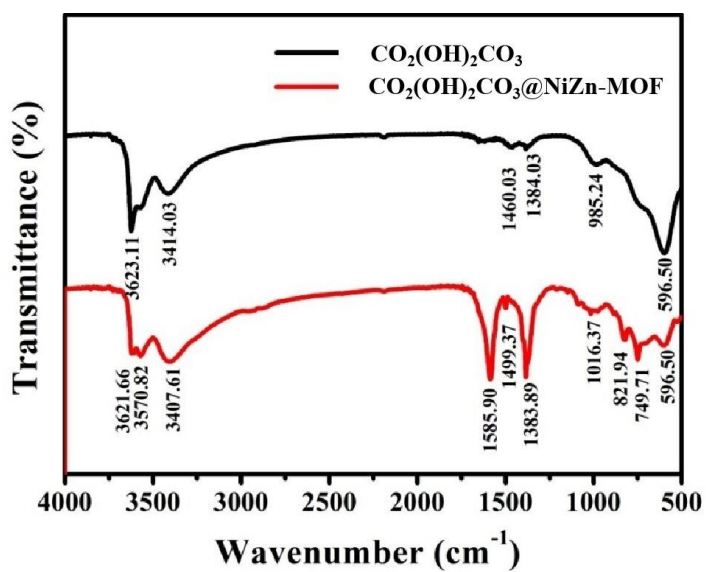

Figure S5. FT-IR spectra of  $\text{CO}_2(\text{OH})_2\text{CO}_3$  and  $\text{CO}_2(\text{OH})_2\text{CO}_3@\text{NiZn-MOF}$  scraped from Ni foam.

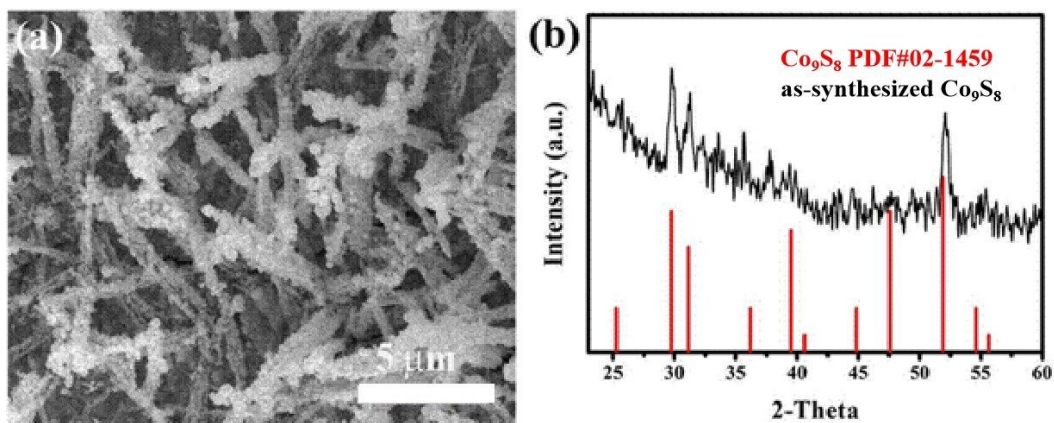

**Figure S6.** (a) SEM images and (b) XRD pattern of as-synthesized  $\text{Co}_9\text{S}_8$ .

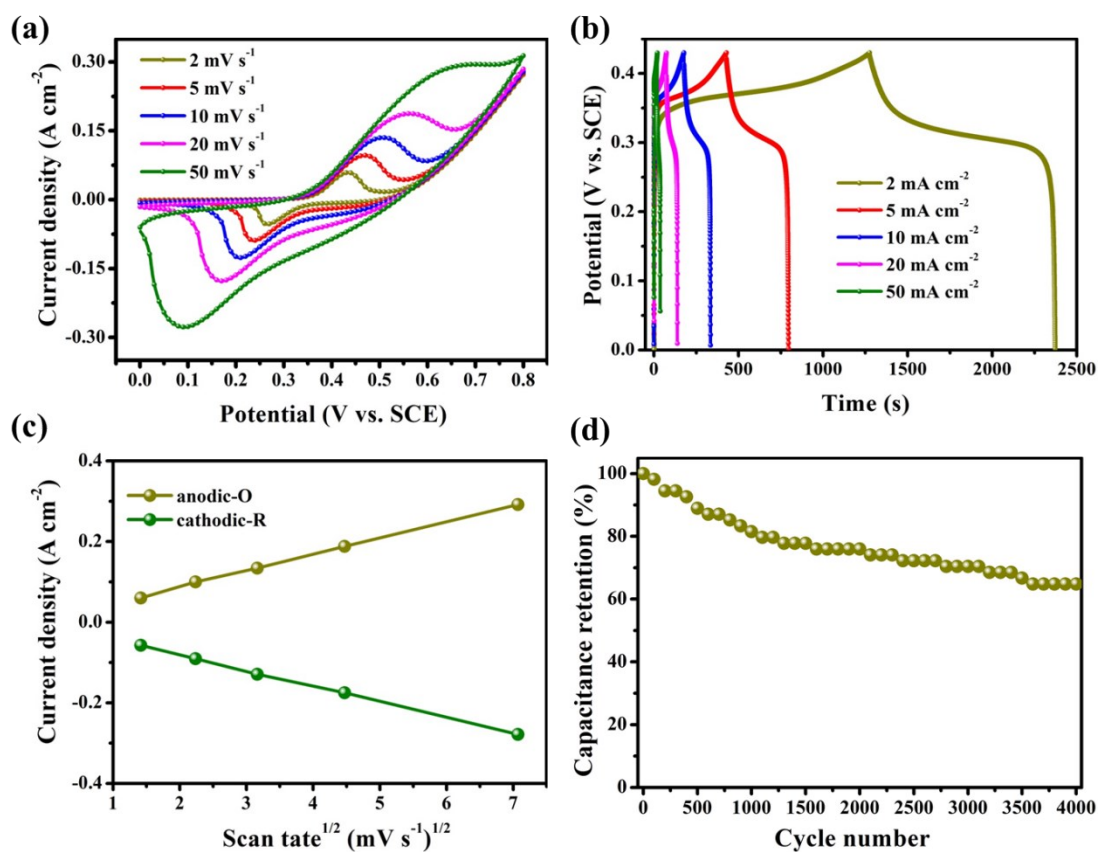

**Figure S7.** (a) CV curves of  $\text{Co}_9\text{S}_8$  array electrode at different scan rates; (b) GCD curves of  $\text{Co}_9\text{S}_8$  array electrode at different current densities; (c)  $i_p$  vs.  $V^{1/2}$  plots of  $\text{Co}_9\text{S}_8$ ; (d) Cycling performance of  $\text{Co}_9\text{S}_8$  array electrode measured at a current density of  $30 \text{ mA cm}^{-2}$  for 4000 cycles.

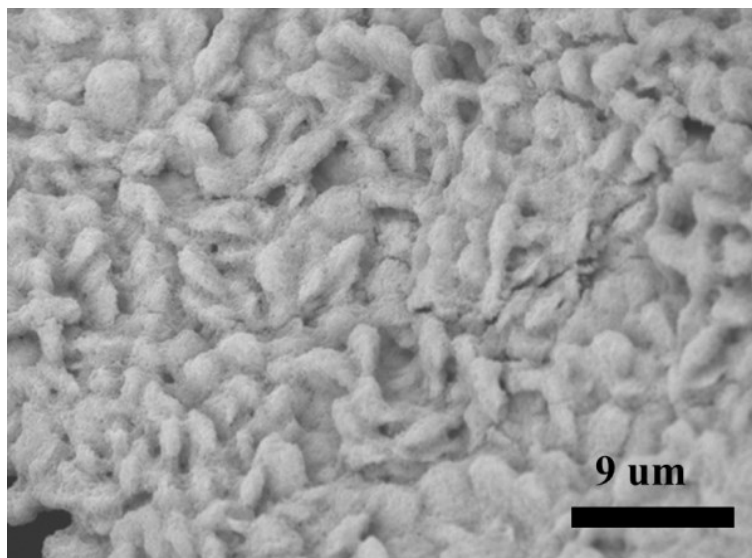

Figure S8. SEM image of Co<sub>9</sub>S<sub>8</sub>@Ni<sub>3</sub>S<sub>2</sub>/ZnS after 4000 cycles.

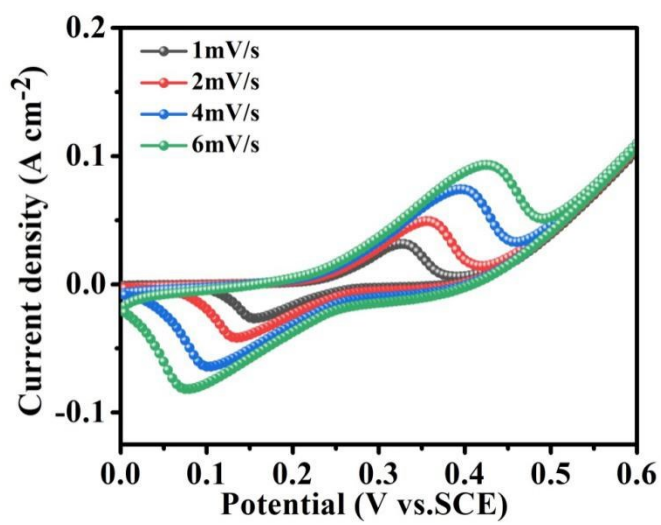

Figure S9. CV curves of Co<sub>9</sub>S<sub>8</sub>@Ni<sub>3</sub>S<sub>2</sub>/ZnS electrode at increasing scan rate (1-6 mV s<sup>-1</sup>).

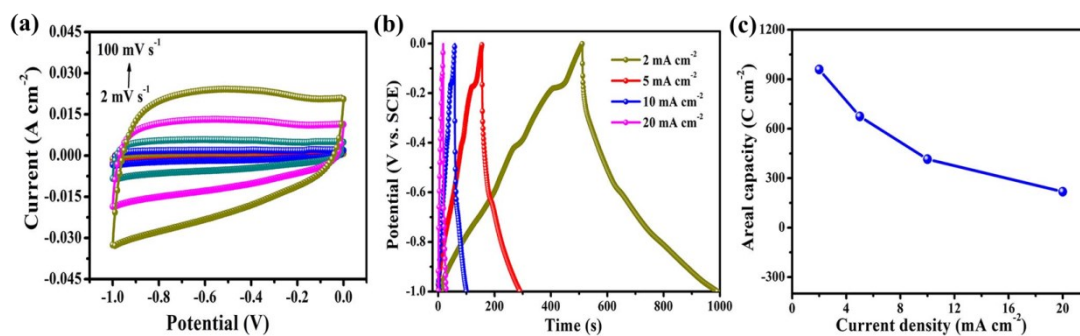

**Figure S10.** (a) CV curves, (b) GCD curves and (c) areal specific capacitance of AC electrode.

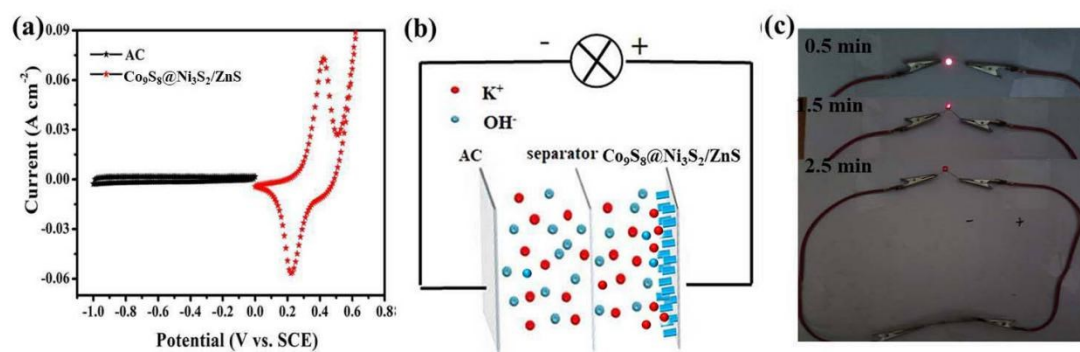

**Figure S11.** (a) CV curves of Co<sub>9</sub>S<sub>8</sub>@Ni<sub>3</sub>S<sub>2</sub>/ZnS and AC; (b) Schematic illustration of assembled supercapattery device; (c) LED indicator lighted up by one supercapattery device.
